# Supplementary material
Source: publisher site journal article supplement (https://www.dovepress.com/article/285000)
Supplement: Supplementary file 1 [file get_supplementary_file.php]

Supplementary Materials

Supporting Methods

The biospecimen collection took place in the mobile examination center (MEC). This included the collecting, processing, storing, and shipping of blood, urine, and other types of specimens. The controlled environment of the MEC allowed laboratory measurements to be performed under identical conditions at each survey location. Two examination sessions are conducted daily. Participants are randomly assigned to exams in the morning session, or in the afternoon or evening sessions. Participants are asked to fast for 9 hours. Participant's fasting status is assessed by the MEC phlebotomist prior to the blood draw. The complete blood count is performed on the Coulter® DxH 800 analyzer using the participants EDTA blood tubes.

|  | OR (95%CI) *P* |
| --- | --- |
| Age | 0.985(0.977-0.993) 0.00016 |
| Sex |  |
| Male | 1.0 |
| Female | 2.381 (1.888- 3.002) <0.0001 |
| Race |  |
| Mexican Ameri | 1.0 |
| Other Hispanic | 1.414 (0.987-2.026) 0.05870 |
| Non-Hispanic White | 0.878 (0.638-1.208) 0.42360 |
| Non-Hispanic Black | 0.780 (0.560-1.086) 0.14079 |
| Other | 0.300 (0.166-0.543) 0.00007 |
| Education |  |
| Primary school | 1.0 |
| High school | 0.570 (0.429-0.758) 0.00011 |
| Above | 0.523 (0.405-0.675) <0.00001 |
| Marital status |  |
| Married/living with partner | 1.0 |
| Widowed/divorced | 1.837 (1.448-2.329) <0.00001 |
| Never married | 1.946 (1.365-2.773) 0.00023 |
| PIR | 0.604 (0.544-0.670) <0.00001 |
| BMI (kg/m2) | 1.048 (1.034-1.062) <0.00001 |
| Smoking |  |
| Never smoker | 1.0 |
| Former smoker | 1.159 (0.901-1.491) 0.24957 |
| Current smoker | 1.899 (1.420-2.541) 0.00002 |
| DM-related characteristics |  |
| HbA1c (%) | 1.051 (0.994-1.112) 0.08241 |
| Diabetes duration (years) | 0.999 (0.989-1.008) 0.77821 |
| Insulin use (%) |  |
| No | 1.0 |
| Yes | 1.172 (0.917-1.496) 0.20441 |
| Diabetic retinopathy |  |
| No | 1.0 |
| Yes | 1.181 (0.914-1.525) 0.20391 |
| Coronary Heart Disease |  |
| No | 1.0 |
| Yes | 1.331 (0.956-1.853) 0.09033 |
| Heart failure |  |
| No | 1.0 |
| Yes | 2.032 (1.484-2.782) <0.00001 |
| Stroke |  |
| No | 1.0 |
| Yes | 1.603 (1.136-2.264) 0.00729 |

Supplementary Table S1 Univariate logistic regression associating variables with diabetic depression.

Abbreviations: OR, odds ratio; CI, confidence interval; PIR, poverty income ratio; BMI, Body Mass Index.

Supplementary Table S2. Association between SII and diabetic depression. a

| SII | OR | 95% CI | P |
| --- | --- | --- | --- |
| Non-adjusted modelb | | | |
| <557.5 | Reference |  |  |
| ≥557.5 | 1.559 | 1.194-2.037 | 0.00112 |
| Fully adjusted modelc | | | |
| <557.5 | Reference |  |  |
| ≥557.5 | 1.395 | 1.030-1.889 | 0.03156 |
| a Participants who had a diagnosis of coronary heart disease, stroke, and heart failure were excluded from the analysis.  b Non-adjusted model: none.  cFully adjusted model: adjusted for age, sex, race, education, marital status, body mass index, HbA1c, insulin use, poverty income ratio, smoking status, and diabetes duration. | | | |

Abbreviation: SII, Systemic immune-inflammation index; OR odds ratio; CI, confidence interval.
